# Supplementary material
Source: Research Square preprint supplement (doi:10.21203/rs.3.rs-9222050/v1)

Supplementary information

Table S1 Definitions and formulae for derived indices evaluated in feature selection.

Table S2 Generalized variance inflation factor (GVIF) analysis for multivariable models in the CHARLS cohort..

Table S3 Schoenfeld residual test results of the multivariate-adjusted Cox regression model in the CHARLS cohort.

Table S4 Sensitivity analysis of the association between CTI-related indices and incident CMM in the complete-case population in the CHARLS cohort.

Table S5 Sensitivity analysis of the association between CTI-related indices and incident CMM excluding participants with a follow-up duration < 2 years in the CHARLS cohort.

Table S6 Sensitivity analysis of the association between CTI-related indices and incident CMM by redefining hypertension as ≥130/80 mmHg in the CHARLS cohort.

Table S7 Sensitivity analysis of the association between CTI-related indices and incident CMM with additional adjustment for depressive symptoms and grip strength in the CHARLS cohort.

Fig. S1 Feature selection using Least Absolute Shrinkage and Selection Operator (LASSO) regression in the CHARLS cohort. (A) Cross-validation plot for the optimal tuning parameter selection; (B) LASSO coefficient profiles of the candidate features.

Fig. S2 Schoenfeld residual plots for testing the proportional hazards assumption in the CHARLS cohort.

Fig. S3 Cumulative incidence curves of incident CMM stratified by quartiles of CTI-WHtR and CTI-WC in the CHARLS and ELSA cohorts.

Fig. S4 Cumulative incidence function (CIF) plots for incident CMM accounting for competing risks in the CHARLS cohort. (A) CTI-WHtR; (B) CTI-WC.

Fig. S5 Weighted quantile sum (WQS) regression analysis evaluating the joint effect and individual weights of components within CTI-WHtR for incident CMM in the CHARLS cohort.

Fig. S6 Weighted quantile sum (WQS) regression analysis evaluating the joint effect and individual weights of components within CTI-WC for incident CMM in the CHARLS cohort.

Fig. S7 Mediation analyses of CTI-WC and new-onset CMM via SBP, and ePWV in the CHARLS cohort.

Table S1 Definitions and formulae for derived indices evaluated in feature selection.

TG: triglycerides ; HDL-C:high-density lipoprotein cholesterol ;WC:waist circumference;

FPG: fasting_plasma_glucose

| Index | Formula |
| --- | --- |
| ABSI  (A Body Shape Index) |  |
| WWI  ((Weight-Adjusted Waist Index) |  |
| BMI  (Body Mass Index) |  |
| RFM  (Relative Fat Mass) | Male:  Female： |
| TyHGB (Triglyceride/HDL-C–Glucose–Body Mass Index Index) |  |
| CI (Conicity Index) |  |
| CVAI  (Chinese Visceral Adiposity Index) | Male:  Female: |
| TyG-WHtR |  |
| TyG-WC |  |
| TyG-ABSI |  |
| TyG–WWI |  |
| TyG- BMI |  |
| TyG- RFM |  |
| TyG- CI |  |
| TyG- CVAI |  |
| CTI-ABSI |  |
| CTI–WWI |  |
| CTI - BMI |  |
| CTI - RFM |  |
| TyG- CI |  |
| TyG- CVAI |  |

Table S2 Generalized variance inflation factor (GVIF) analysis for multivariable models in the CHARLS cohort..

| Variable Name | GVIF | Df | GVIF^(1/(2*Df)) |
| --- | --- | --- | --- |
| Age | 1.6265 | 1 | 1.2754 |
| Sex | 2.4178 | 1 | 1.5549 |
| Education | 1.2804 | 2 | 1.0637 |
| Marital_status | 1.0102 | 1 | 1.0051 |
| Smoking | 1.9515 | 1 | 1.3970 |
| Alcohol use | 1.4567 | 1 | 1.2069 |
| Hypertension | 1.0569 | 1 | 1.0280 |
| eGFR | 1.5004 | 1 | 1.2249 |
| LDL | 1.0797 | 1 | 1.0245 |
| HDL | 1.0478 | 1 | 1.0236 |

Table S3 Schoenfeld residual test results of the multivariate-adjusted Cox regression model in the CHARLS cohort.

| Variable | χ2 | P value |
| --- | --- | --- |
| Age | 1.35 | 0.246 |
| Gender | 0.01 | 0.917 |
| Education level | 1.66 | 0.435 |
| Marital status | 0.35 | 0.554 |
| Smoking status | 0.00 | 0.976 |
| Alcohol consumption | 3.35 | 0.067 |
| Hypertension | 0.06 | 0.813 |
| LDL-C | 0.13 | 0.716 |
| HDL-C | 0.69 | 0.406 |
| Kidney disease | 3.82 | 0.051 |
| CTI-WHtR (Main Exposure) | 2.65 | 0.104 |
| **Global Test** | **19.27** | **0.082** |

Table S4 Sensitivity analysis of the association between CTI-related indices and incident CMM in the complete-case population within the CHARLS cohort.

|  | Model 1 | | Model 2 | | Model 3 | |
| --- | --- | --- | --- | --- | --- | --- |
| Characteristic | HR (95% CI) | P-value | HR (95% CI) | P-value | HR (95% CI) | P-value |
| Continuous CTI-WHtR | 1.90 (1.78-2.03) | <0.001 | 1.88 (1.75-2.02) | <0.001 | 1.78 (1.64-1.94) | <0.001 |
| Quartile CTI-WHtR |  |  |  |  |  |  |
| Q1 (Ref.) | 1.00 |  | 1.00 |  | 1.00 |  |
| Q2 | 1.71 (1.22-2.39) | 0.002 | 1.73 (1.23-2.42) | 0.001 | 1.63 (1.16-2.29) | 0.005 |
| Q3 | 3.27 (2.41-4.44) | <0.001 | 3.25 (2.39-4.42) | <0.001 | 2.83 (2.06-3.90) | <0.001 |
| Q4 | 6.22 (4.66-8.31) | <0.001 | 6.13 (4.56-8.24) | <0.001 | 4.86 (3.51-6.74) | <0.001 |
| P for trend |  | <0.001 |  | <0.001 |  | <0.001 |
| Continuous CTI-WC | 1.90 (1.77-2.03) | <0.001 | 1.89 (1.77-2.02) | <0.001 | 1.83 (1.68-1.99) | <0.001 |
| Quartile CTI-WC |  |  |  |  |  |  |
| Q1 (Ref.) | 1.00 |  | 1.00 |  | 1.00 |  |
| Q2 | 1.61 (1.15-2.25) | 0.005 | 1.61 (1.15-2.25) | 0.005 | 1.54 (1.10-2.16) | 0.012 |
| Q3 | 3.16 (2.34-4.28) | <0.001 | 3.12 (2.30-4.22) | <0.001 | 2.81 (2.05-3.86) | <0.001 |
| Q4 | 5.98 (4.50-7.95) | <0.001 | 5.88 (4.42-7.83) | <0.001 | 4.85 (3.52-6.69) | <0.001 |
| P for trend |  | <0.001 |  | <0.001 |  | <0.001 |
| Continuous TyG-WHtR | 1.88 (1.75-2.01) | <0.001 | 1.87 (1.74-2.01) | <0.001 | 1.77 (1.63-1.93) | <0.001 |
| Quartile TyG-WHtR |  |  |  |  |  |  |
| Q1 (Ref.) | 1.00 |  | 1.00 |  | 1.00 |  |
| Q2 | 1.84 (1.31-2.57) | <0.001 | 1.88 (1.35-2.64) | <0.001 | 1.75 (1.24-2.45) | 0.001 |
| Q3 | 3.49 (2.57-4.75) | <0.001 | 3.56 (2.61-4.86) | <0.001 | 3.05 (2.21-4.21) | <0.001 |
| Q4 | 6.07 (4.53-8.13) | <0.001 | 6.14 (4.55-8.28) | <0.001 | 4.75 (3.41-6.60) | <0.001 |
| P for trend |  | <0.001 |  | <0.001 |  | <0.001 |
| Continuous TyG-WC | 1.87 (1.74-2.00) | <0.001 | 1.88 (1.75-2.01) | <0.001 | 1.82 (1.67-1.98) | <0.001 |
| Quartile TyG-WC |  |  |  |  |  |  |
| Q1 (Ref.) | 1.00 |  | 1.00 |  | 1.00 |  |
| Q2 | 1.63 (1.17-2.26) | 0.004 | 1.64 (1.18-2.27) | 0.003 | 1.57 (1.12-2.18) | 0.008 |
| Q3 | 3.13 (2.32-4.21) | <0.001 | 3.10 (2.30-4.18) | <0.001 | 2.70 (1.98-3.69) | <0.001 |
| Q4 | 5.57 (4.20-7.38) | <0.001 | 5.56 (4.19-7.37) | <0.001 | 4.47 (3.26-6.13) | <0.001 |
| P for trend |  | <0.001 |  | <0.001 |  | <0.001 |

Model 1: was unadjusted.;

Model 2: was adjusted for age and sex;

Model 3: was adjusted for age, sex, educational level, marital status, smoking status, drinking status, hypertension, eGFR, LDL-C, and HDL-C.

Table S5 Sensitivity analysis excluding participants with follow-up duration <2 years within the CHARLS cohort.

|  | Model 1 | | Model 2 | | Model 3 | |
| --- | --- | --- | --- | --- | --- | --- |
| Characteristic | HR (95% CI) | P-value | HR (95% CI) | P-value | HR (95% CI) | P-value |
| Continuous CTI-WHtR | 1.78 (1.65-1.92) | <0.001 | 1.76 (1.63-1.90) | <0.001 | 1.59 (1.45-1.74) | <0.001 |
| Quartiles of CTI-WHtR |  |  |  |  |  |  |
| Q1 (Ref.) | 1.00 |  | 1.00 |  | 1.00 |  |
| Q2 | 1.43 (1.00-2.05) | 0.053 | 1.43 (1.00-2.06) | 0.051 | 1.30 (0.90-1.87) | 0.162 |
| Q3 | 3.08 (2.24-4.25) | <0.001 | 3.05 (2.21-4.21) | <0.001 | 2.48 (1.77-3.47) | <0.001 |
| Q4 | 5.18 (3.82-7.02) | <0.001 | 5.06 (3.70-6.91) | <0.001 | 3.60 (2.55-5.09) | <0.001 |
| P for trend |  | <0.001 |  | <0.001 |  | <0.001 |
| Continuous CTI-WC | 1.78 (1.65-1.91) | <0.001 | 1.77 (1.64-1.91) | <0.001 | 1.63 (1.48-1.78) | <0.001 |
| Quartiles of CTI-WC |  |  |  |  |  |  |
| Q1 (Ref.) | 1.00 |  | 1.00 |  | 1.00 |  |
| Q2 | 1.31 (0.92-1.86) | 0.129 | 1.31 (0.92-1.87) | 0.127 | 1.20 (0.84-1.71) | 0.314 |
| Q3 | 2.55 (1.86-3.48) | <0.001 | 2.53 (1.85-3.46) | <0.001 | 2.12 (1.53-2.94) | <0.001 |
| Q4 | 4.84 (3.61-6.48) | <0.001 | 4.75 (3.55-6.36) | <0.001 | 3.48 (2.50-4.86) | <0.001 |
| P for trend |  | <0.001 |  | <0.001 |  | <0.001 |
| Continuous TyG-WHtR | 1.76 (1.63-1.90) | <0.001 | 1.75 (1.62-1.89) | <0.001 | 1.57 (1.43-1.73) | <0.001 |
| Quartiles of TyG-WHtR |  |  |  |  |  |  |
| Q1 (Ref.) | 1.00 |  | 1.00 |  | 1.00 |  |
| Q2 | 1.72 (1.21-2.44) | 0.002 | 1.75 (1.24-2.49) | 0.002 | 1.55 (1.09-2.21) | 0.016 |
| Q3 | 2.92 (2.11-4.03) | <0.001 | 2.97 (2.14-4.11) | <0.001 | 2.33 (1.66-3.27) | <0.001 |
| Q4 | 5.03 (3.71-6.83) | <0.001 | 5.07 (3.70-6.93) | <0.001 | 3.47 (2.45-4.91) | <0.001 |
| P for trend |  | <0.001 |  | <0.001 |  | <0.001 |
| Continuous TyG-WC | 1.75 (1.62-1.88) | <0.001 | 1.76 (1.63-1.90) | <0.001 | 1.61 (1.47-1.77) | <0.001 |
| Quartiles of TyG-WC |  |  |  |  |  |  |
| Q1 (Ref.) | 1.00 |  | 1.00 |  | 1.00 |  |
| Q2 | 1.18 (0.84-1.66) | 0.332 | 1.19 (0.85-1.67) | 0.321 | 1.08 (0.76-1.52) | 0.677 |
| Q3 | 2.36 (1.75-3.19) | <0.001 | 2.36 (1.75-3.19) | <0.001 | 1.89 (1.38-2.60) | <0.001 |
| Q4 | 4.17 (3.15-5.53) | <0.001 | 4.17 (3.15-5.53) | <0.001 | 2.95 (2.14-4.06) | <0.001 |
| P for trend |  | <0.001 |  | <0.001 |  | <0.001 |

Model 1: was unadjusted.;

Model 2: was adjusted for age and sex;

Model 3: was adjusted for age, sex, educational level, marital status, smoking status, drinking status, hypertension, eGFR, LDL-C, and HDL-C.

Table S6 Sensitivity analysis redefining hypertension as ≥130/80 mmHg within the CHARLS cohort.

|  | Model 1 | | Model 2 | | Model 3 | |
| --- | --- | --- | --- | --- | --- | --- |
| Characteristic | HR (95% CI) | P-value | HR (95% CI) | P-value | HR (95% CI) | P-value |
| Continuous CTI-WHtR | 1.86 (1.75-1.98) | <0.001 | 1.84 (1.73-1.97) | <0.001 | 1.66 (1.54-1.80) | <0.001 |
| Quartiles of CTI-WHtR |  |  |  |  |  |  |
| Q1 (Ref.) | 1.00 |  | 1.00 |  | 1.00 |  |
| Q2 | 1.62 (1.19-2.19) | 0.002 | 1.62 (1.19-2.20) | 0.002 | 1.45 (1.06-1.97) | 0.019 |
| Q3 | 3.20 (2.43-4.22) | <0.001 | 3.17 (2.40-4.18) | <0.001 | 2.50 (1.87-3.34) | <0.001 |
| Q4 | 5.87 (4.52-7.62) | <0.001 | 5.75 (4.40-7.50) | <0.001 | 3.96 (2.94-5.33) | <0.001 |
| P for trend |  | <0.001 |  | <0.001 |  | <0.001 |
| Continuous CTI-WC | 1.86 (1.74-1.97) | <0.001 | 1.85 (1.74-1.97) | <0.001 | 1.70 (1.58-1.84) | <0.001 |
| Quartiles of CTI-WC |  |  |  |  |  |  |
| Q1 (Ref.) | 1.00 |  | 1.00 |  | 1.00 |  |
| Q2 | 1.45 (1.07-1.95) | 0.016 | 1.45 (1.07-1.95) | 0.017 | 1.31 (0.97-1.78) | 0.080 |
| Q3 | 2.97 (2.27-3.89) | <0.001 | 2.94 (2.25-3.84) | <0.001 | 2.37 (1.78-3.14) | <0.001 |
| Q4 | 5.44 (4.23-7.01) | <0.001 | 5.34 (4.14-6.88) | <0.001 | 3.81 (2.85-5.07) | <0.001 |
| P for trend |  | <0.001 |  | <0.001 |  | <0.001 |
| Continuous TyG-WHtR | 1.84 (1.73-1.96) | <0.001 | 1.83 (1.72-1.96) | <0.001 | 1.65 (1.53-1.79) | <0.001 |
| Quartiles of TyG-WHtR |  |  |  |  |  |  |
| Q1 (Ref.) | 1.00 |  | 1.00 |  | 1.00 |  |
| Q2 | 1.59 (1.18-2.15) | 0.002 | 1.62 (1.20-2.19) | 0.002 | 1.44 (1.06-1.95) | 0.020 |
| Q3 | 3.12 (2.38-4.10) | <0.001 | 3.19 (2.43-4.20) | <0.001 | 2.47 (1.85-3.28) | <0.001 |
| Q4 | 5.45 (4.22-7.05) | <0.001 | 5.51 (4.23-7.17) | <0.001 | 3.70 (2.76-4.97) | <0.001 |
| P for trend |  | <0.001 |  | <0.001 |  | <0.001 |
| Continuous TyG-WC | 1.82 (1.71-1.94) | <0.001 | 1.84 (1.73-1.96) | <0.001 | 1.69 (1.56-1.83) | <0.001 |
| Quartiles of TyG-WC |  |  |  |  |  |  |
| Q1 (Ref.) | 1.00 |  | 1.00 |  | 1.00 |  |
| Q2 | 1.52 (1.13-2.04) | 0.005 | 1.52 (1.13-2.04) | 0.005 | 1.38 (1.02-1.86) | 0.034 |
| Q3 | 2.90 (2.23-3.79) | <0.001 | 2.90 (2.22-3.78) | <0.001 | 2.27 (1.72-3.01) | <0.001 |
| Q4 | 5.12 (3.98-6.58) | <0.001 | 5.11 (3.97-6.57) | <0.001 | 3.54 (2.66-4.69) | <0.001 |
| P for trend |  | <0.001 |  | <0.001 |  | <0.001 |

Model 1: was unadjusted.;

Model 2: was adjusted for age and sex;

Model 3: was adjusted for age, sex, educational level, marital status, smoking status, drinking status, hypertension, eGFR, LDL-C, and HDL-C.

Table S7 Sensitivity analysis with additional adjustment for depressive symptoms and grip strength within the CHARLS cohort.

|  | Model 1 | | Model 2 | | Model 3 | |
| --- | --- | --- | --- | --- | --- | --- |
| Characteristic | HR (95% CI) | P-value | HR (95% CI) | P-value | HR (95% CI) | P-value |
| Continuous CTI-WHtR | 1.86 (1.75-1.98) | <0.001 | 1.84 (1.73-1.97) | <0.001 | 1.76 (1.63-1.91) | <0.001 |
| Quartiles of CTI-WHtR |  |  |  |  |  |  |
| Q1 (Ref.) | 1.00 |  | 1.00 |  | 1.00 |  |
| Q2 | 1.62 (1.19-2.19) | 0.002 | 1.62 (1.19-2.20) | 0.002 | 1.52 (1.12-2.07) | 0.008 |
| Q3 | 3.20 (2.43-4.22) | <0.001 | 3.17 (2.40-4.18) | <0.001 | 2.74 (2.05-3.66) | <0.001 |
| Q4 | 5.87 (4.52-7.62) | <0.001 | 5.75 (4.40-7.50) | <0.001 | 4.63 (3.45-6.23) | <0.001 |
| P for trend |  | <0.001 |  | <0.001 |  | <0.001 |
| Continuous CTI-WC | 1.86 (1.74-1.97) | <0.001 | 1.85 (1.74-1.97) | <0.001 | 1.81 (1.68-1.95) | <0.001 |
| Quartiles of CTI-WC |  |  |  |  |  |  |
| Q1 (Ref.) | 1.00 |  | 1.00 |  | 1.00 |  |
| Q2 | 1.45 (1.07-1.95) | 0.016 | 1.45 (1.07-1.95) | 0.017 | 1.38 (1.02-1.87) | 0.040 |
| Q3 | 2.97 (2.27-3.89) | <0.001 | 2.94 (2.25-3.84) | <0.001 | 2.61 (1.97-3.46) | <0.001 |
| Q4 | 5.44 (4.23-7.01) | <0.001 | 5.34 (4.14-6.88) | <0.001 | 4.47 (3.35-5.95) | <0.001 |
| P for trend |  | <0.001 |  | <0.001 |  | <0.001 |
| Continuous TyG-WHtR | 1.84 (1.73-1.96) | <0.001 | 1.83 (1.72-1.96) | <0.001 | 1.75 (1.62-1.89) | <0.001 |
| Quartiles of TyG-WHtR |  |  |  |  |  |  |
| Q1 (Ref.) | 1.00 |  | 1.00 |  | 1.00 |  |
| Q2 | 1.59 (1.18-2.15) | 0.002 | 1.62 (1.20-2.19) | 0.002 | 1.49 (1.10-2.02) | 0.010 |
| Q3 | 3.12 (2.38-4.10) | <0.001 | 3.19 (2.43-4.20) | <0.001 | 2.71 (2.04-3.61) | <0.001 |
| Q4 | 5.45 (4.22-7.05) | <0.001 | 5.51 (4.23-7.17) | <0.001 | 4.31 (3.22-5.77) | <0.001 |
| P for trend |  | <0.001 |  | <0.001 |  | <0.001 |
| Continuous TyG-WC | 1.82 (1.71-1.94) | <0.001 | 1.84 (1.73-1.96) | <0.001 | 1.80 (1.67-1.95) | <0.001 |
| Quartiles of TyG-WC |  |  |  |  |  |  |
| Q1 (Ref.) | 1.00 |  | 1.00 |  | 1.00 |  |
| Q2 | 1.52 (1.13-2.04) | 0.005 | 1.52 (1.13-2.04) | 0.005 | 1.45 (1.07-1.95) | 0.015 |
| Q3 | 2.90 (2.23-3.79) | <0.001 | 2.90 (2.22-3.78) | <0.001 | 2.52 (1.90-3.33) | <0.001 |
| Q4 | 5.12 (3.98-6.58) | <0.001 | 5.11 (3.97-6.57) | <0.001 | 4.23 (3.19-5.61) | <0.001 |
| P for trend |  | <0.001 |  | <0.001 |  | <0.001 |

Model 1: was unadjusted.;

Model 2: was adjusted for age and sex;

Model 3: was adjusted for age, sex, educational level, marital status, smoking status, drinking status, hypertension, eGFR, LDL-C, and HDL-C.

Fig. S1 Feature selection using Least Absolute Shrinkage and Selection Operator (LASSO) regression in the CHARLS cohort. (A) Cross-validation plot for the optimal tuning parameter selection; (B) LASSO coefficient profiles of the candidate features.


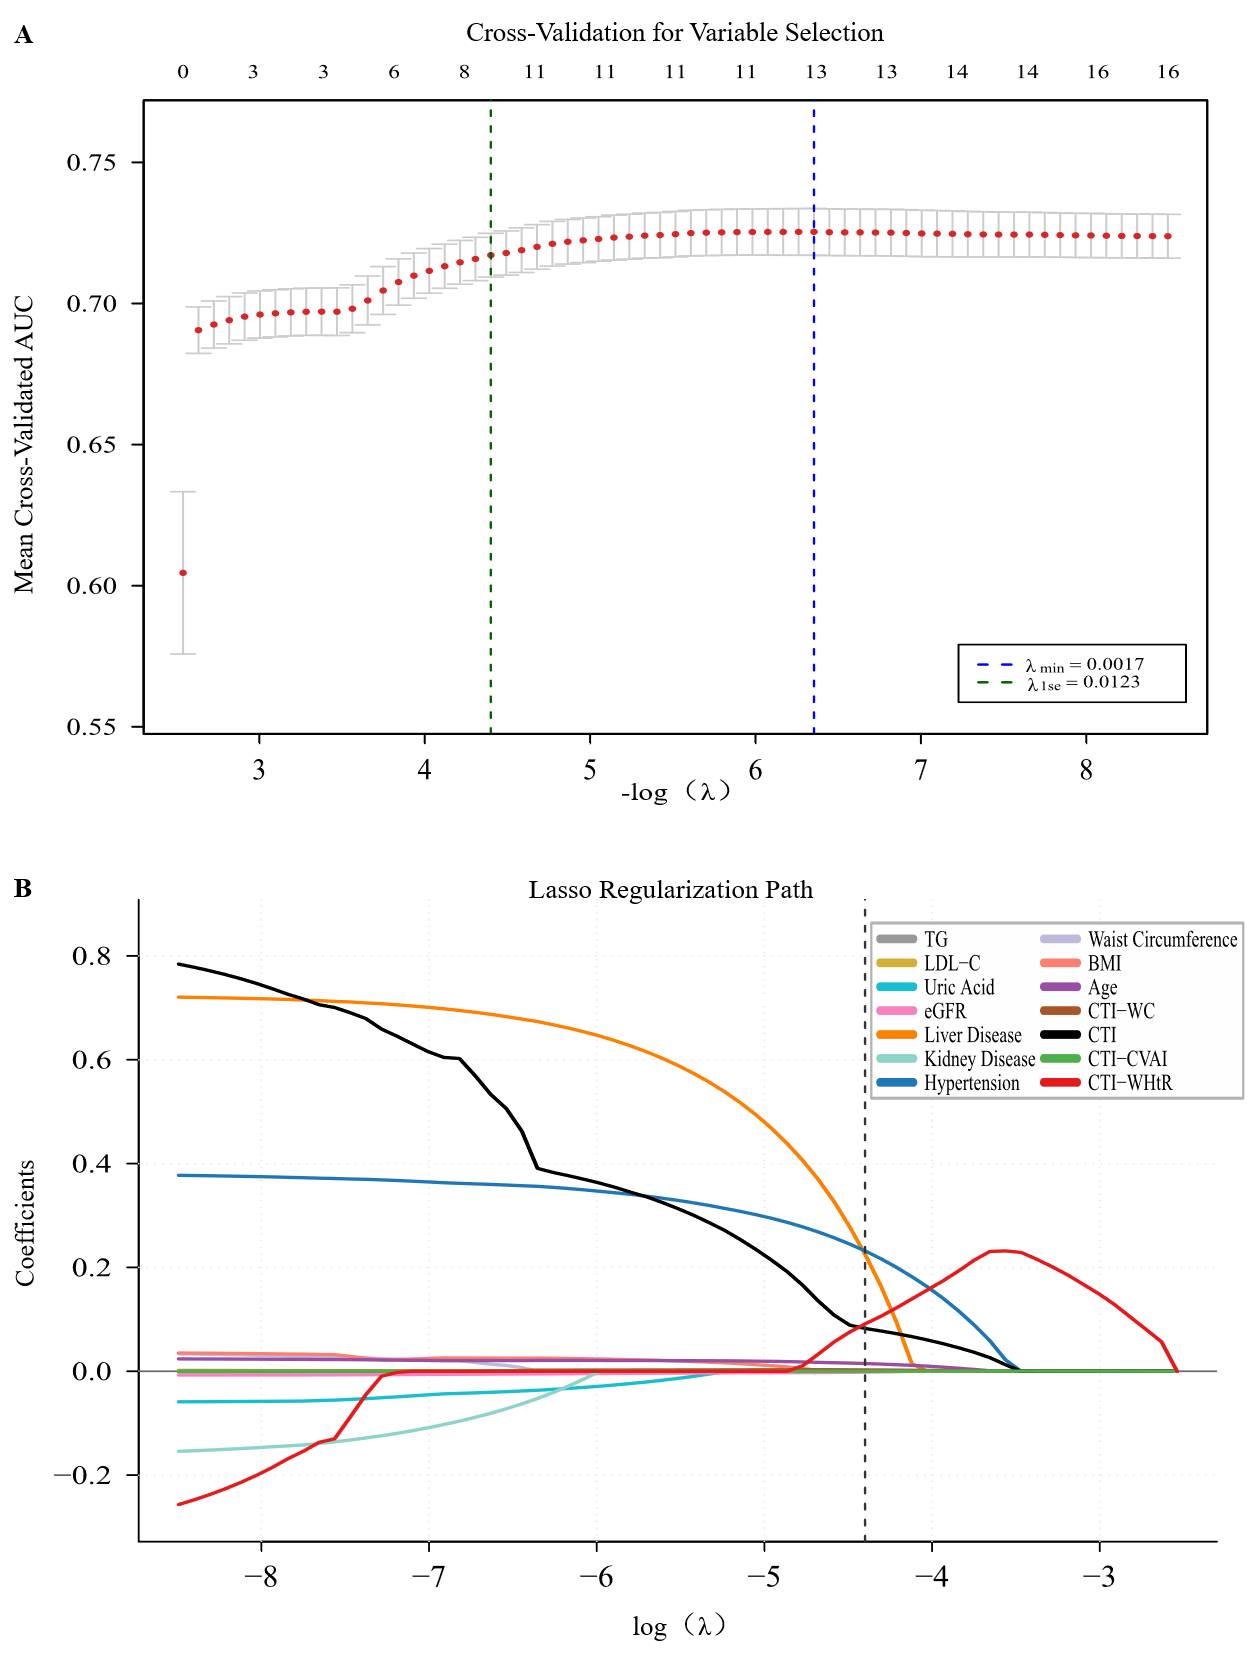


Fig. S2 Schoenfeld residual plots for testing the proportional hazards assumption in the CHARLS cohort.


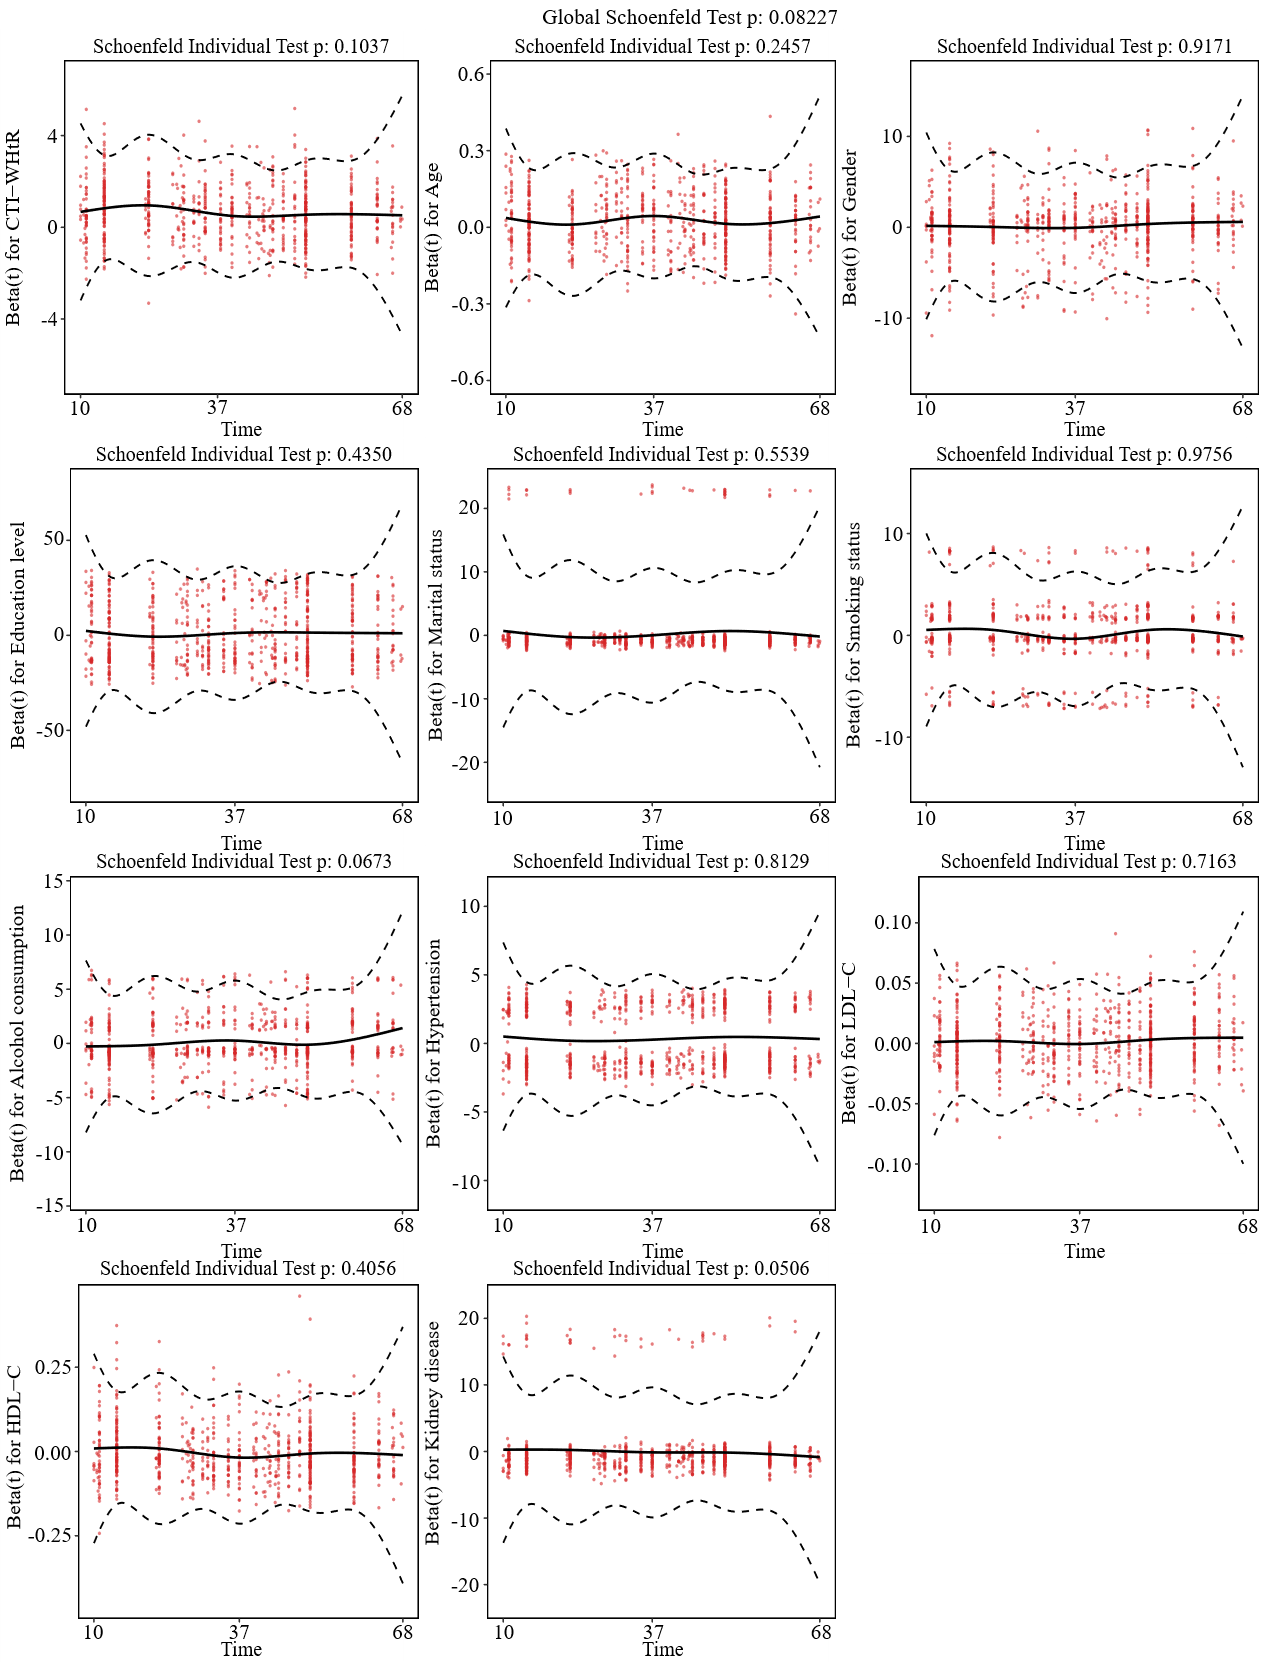


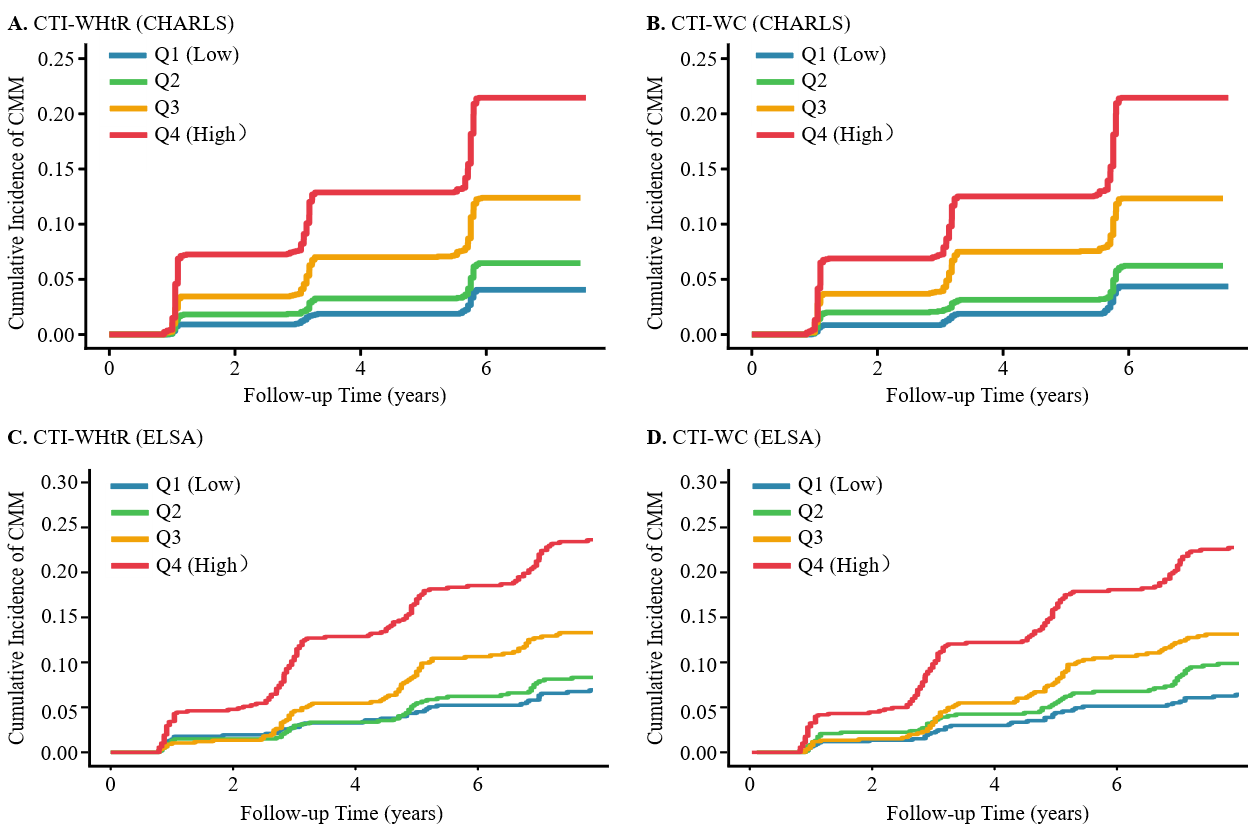
Fig. S3 Cumulative incidence curves of incident CMM stratified by quartiles of CTI-WHtR and CTI-WC in the CHARLS and ELSA cohorts.

Fig. S4 Cumulative incidence function (CIF) plots for incident CMM accounting for competing risks in the CHARLS cohort. (A) CTI-WHtR; (B) CTI-WC.


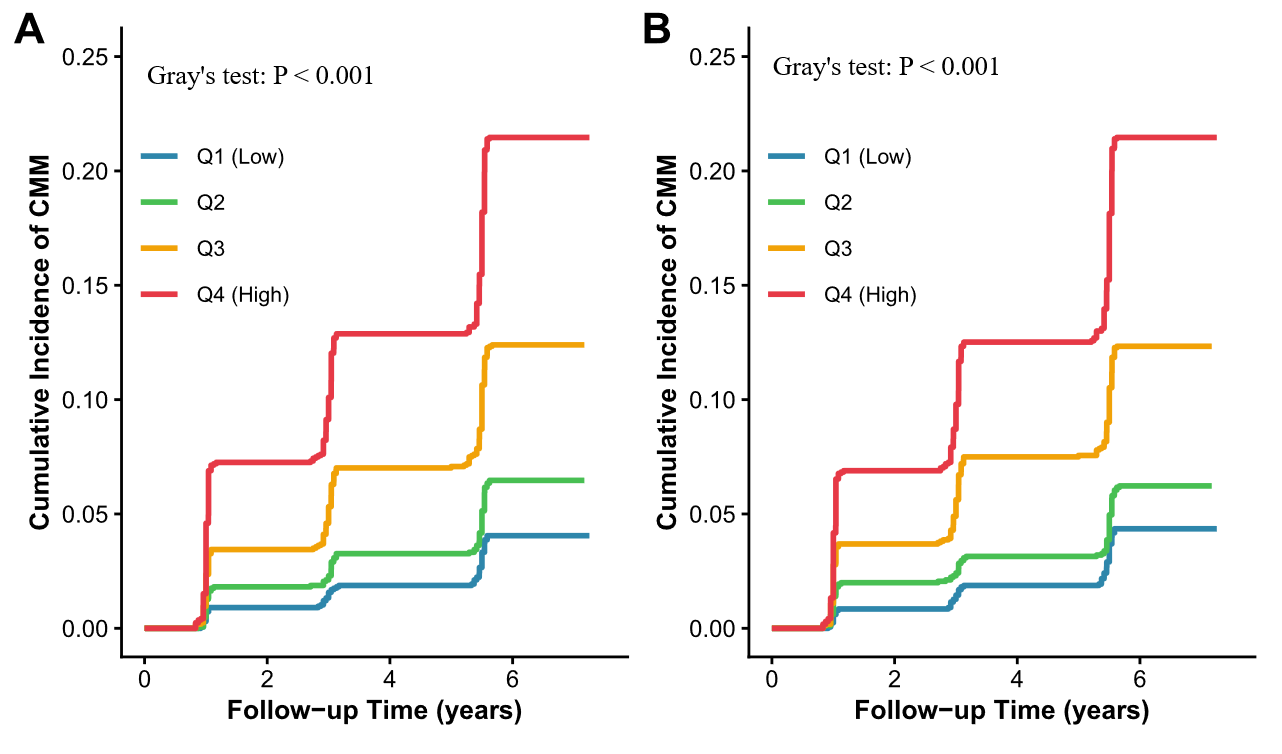


Fig. S5 Weighted quantile sum (WQS) regression analysis evaluating the joint effect and individual weights of components within CTI-WHtR for incident CMM in the CHARLS cohort.


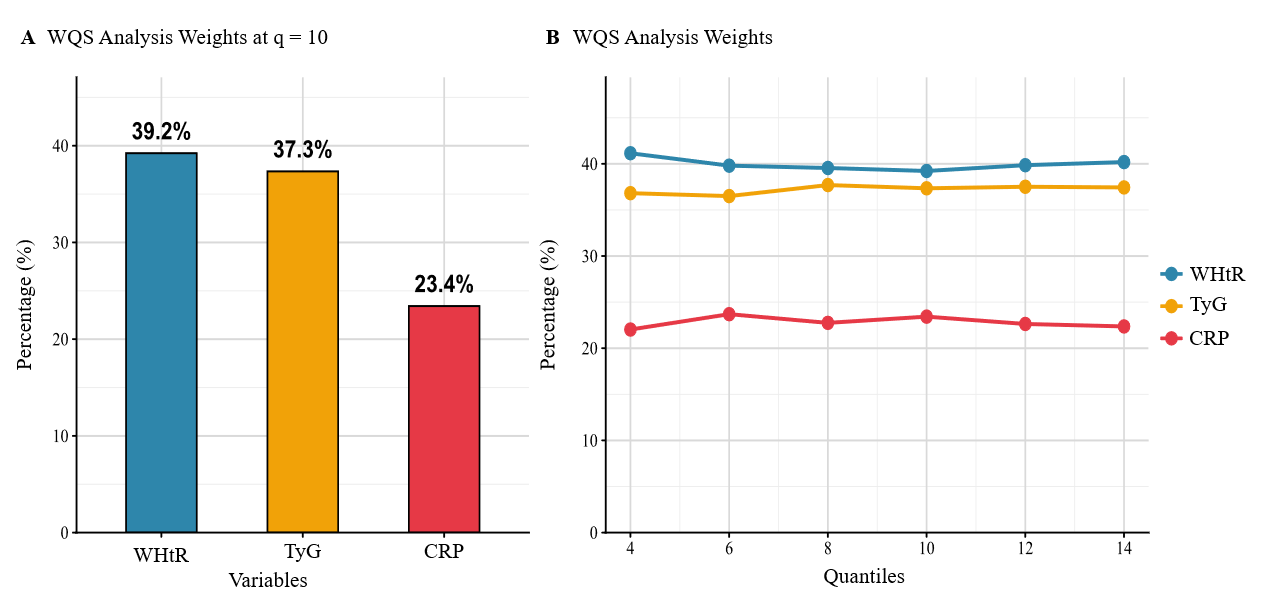


Fig. S6 Weighted quantile sum (WQS) regression analysis evaluating the joint effect and individual weights of components within CTI-WC for incident CMM in the CHARLS cohort.


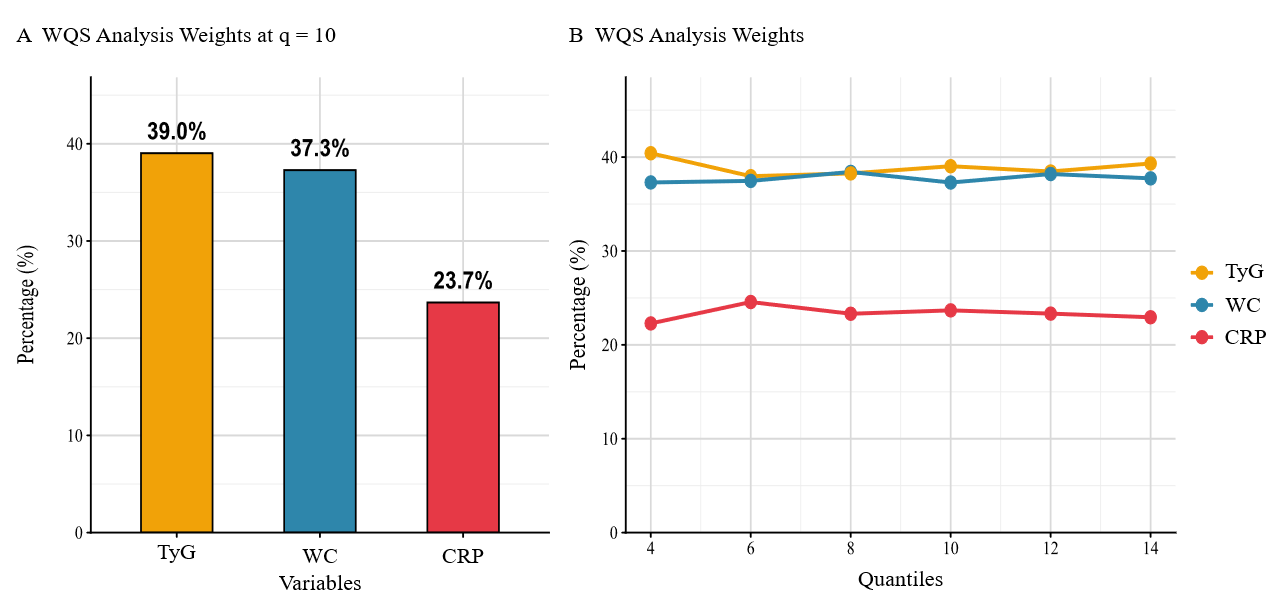


Fig. S7 Mediation analyses of CTI-WC and new-onset CMM via SBP, and ePWV in the CHARLS cohort.


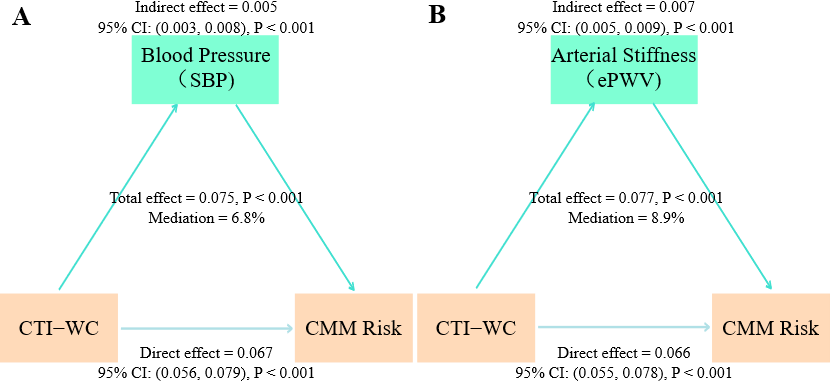

Supplement: Supplementary file 1 [file 8c44f7e603222ca35c605037.docx]
